# Supplementary figures and images for: The mosaic structure of the symbiotic plasmid of Rhizobium etliCFN42 and its relation to other symbiotic genome compartments
Source: Springer Nature journal article supplement (doi:10.1186/gb-2003-4-6-r36), 2003-05-13

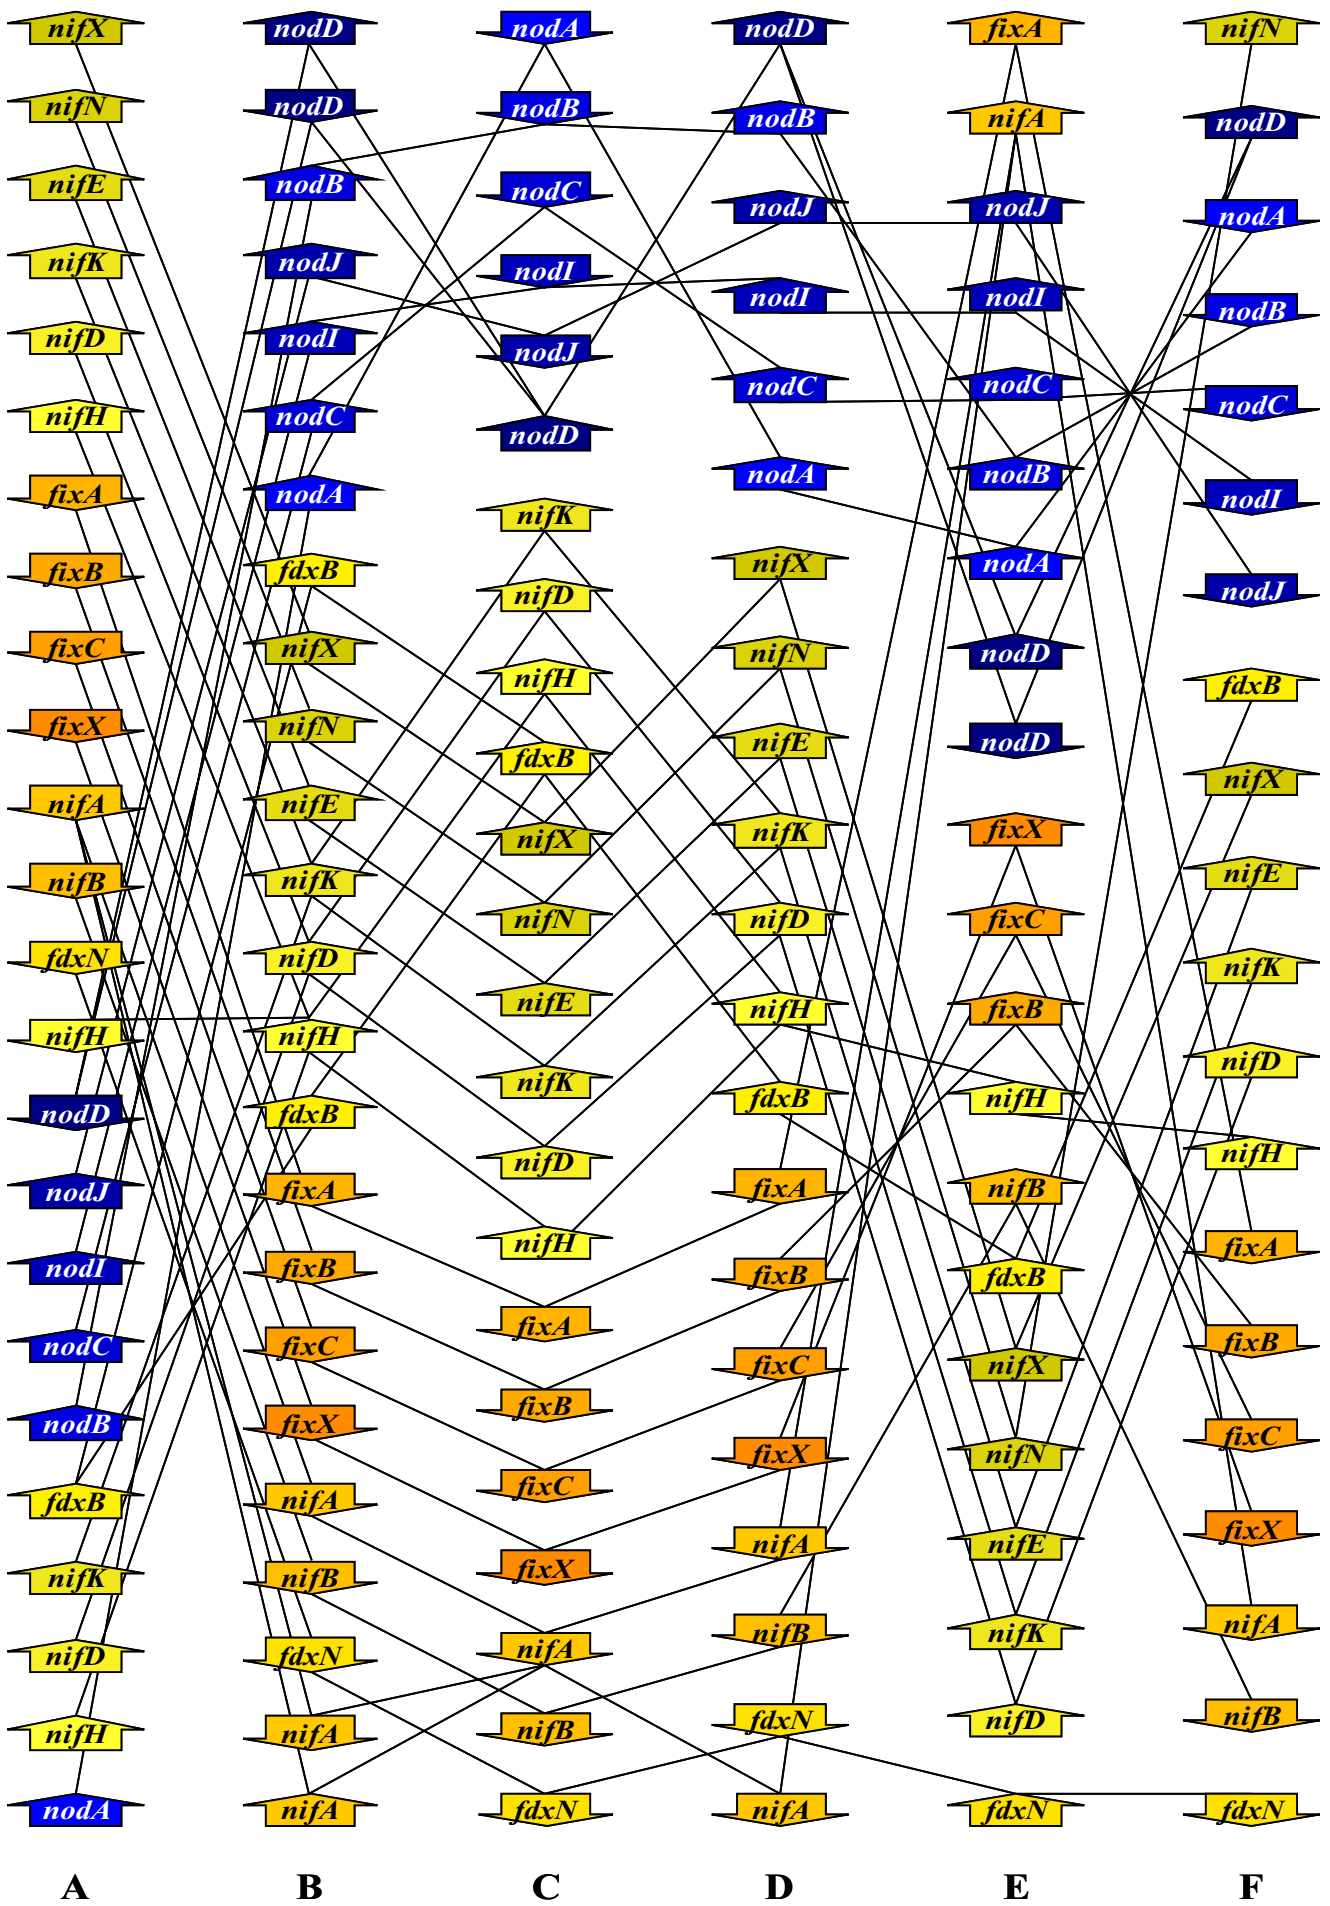

Supplement: Additional file 6 [file gb-2003-4-6-r36-s6.pdf]
